# Supplementary material for: Characterization and Antimicrobial Activity of a Halophyte from the Asturian Coast (Spain): Limonium binervosum (G.E.Sm.) C.E.Salmon
Source: MDPI journal article supplement (doi:10.3390/plants10091852), 2021-09-07
Supplement: s1 [file s1]

# Characterization and antimicrobial activity of a halophyte from the Asturian coast (Spain): *Limonium binervosum* (G.E.Sm.) C.E.Salmon

## SUPPORTING INFORMATION

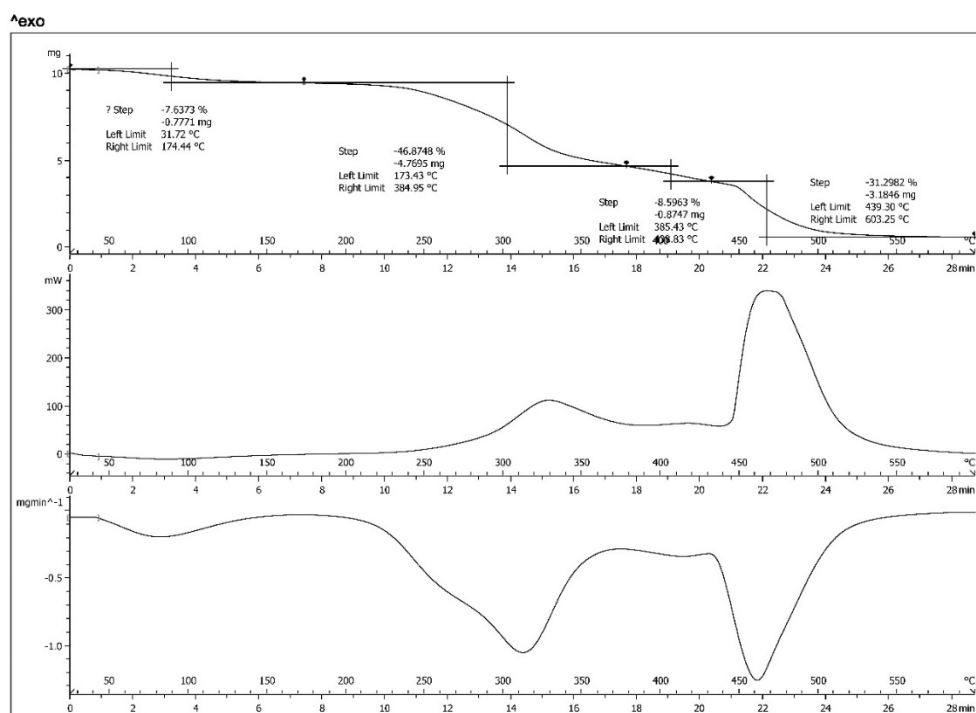

Figure S1. TG (top), DTG (center) and DSC (bottom) curves for *L. binervosum* flowers.

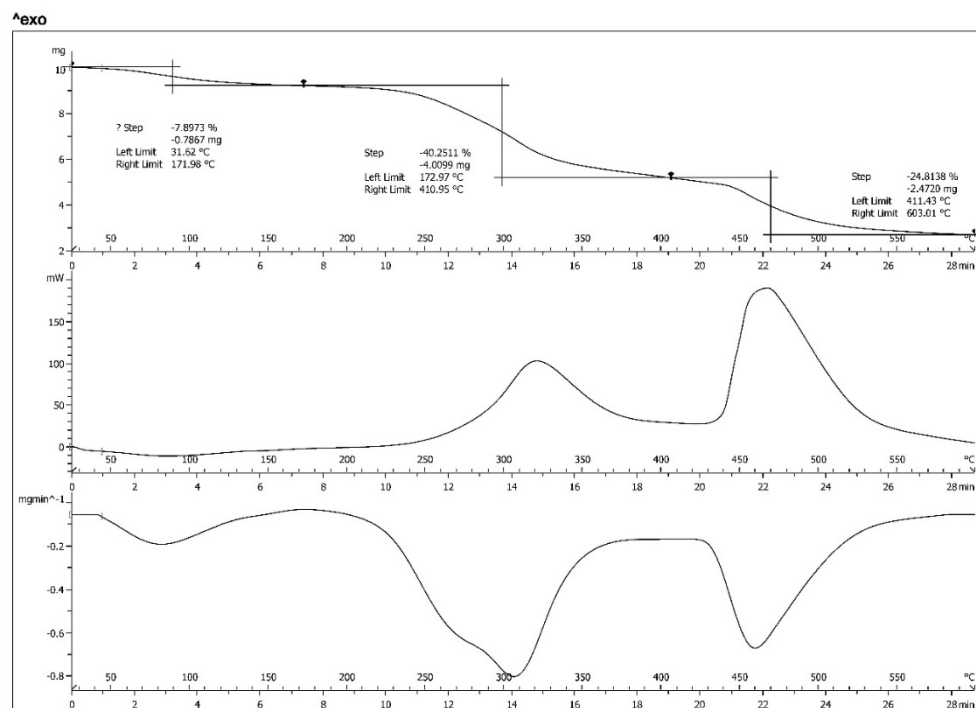

Figure S2. TG (top), DTG (center) and DSC (bottom) curves for *L. binervosum* leaves.

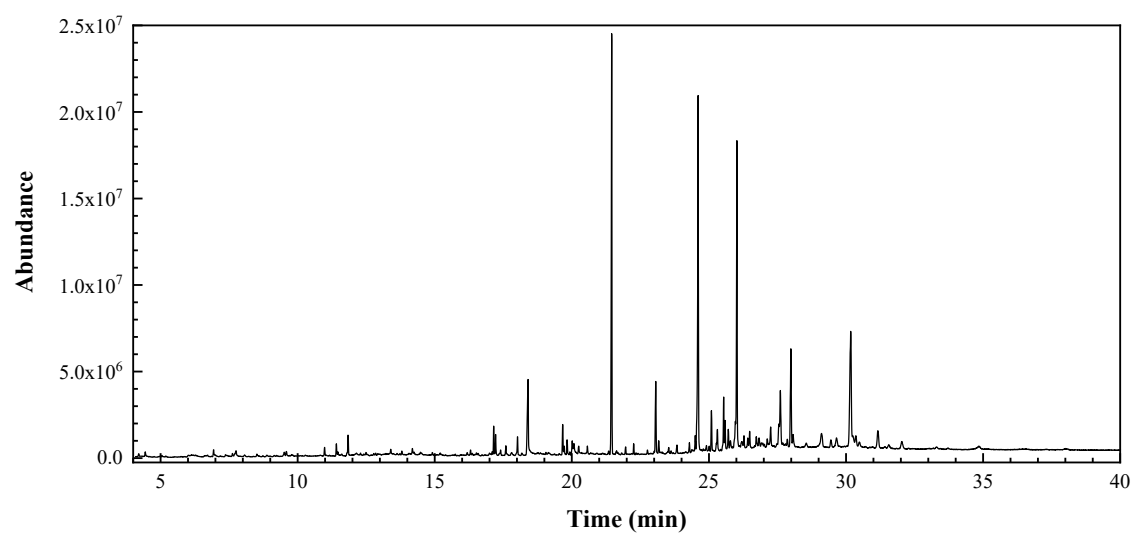

**Figure S3.** GC–MS chromatogram of *L. binervosum* flower hydromethanolic extract.

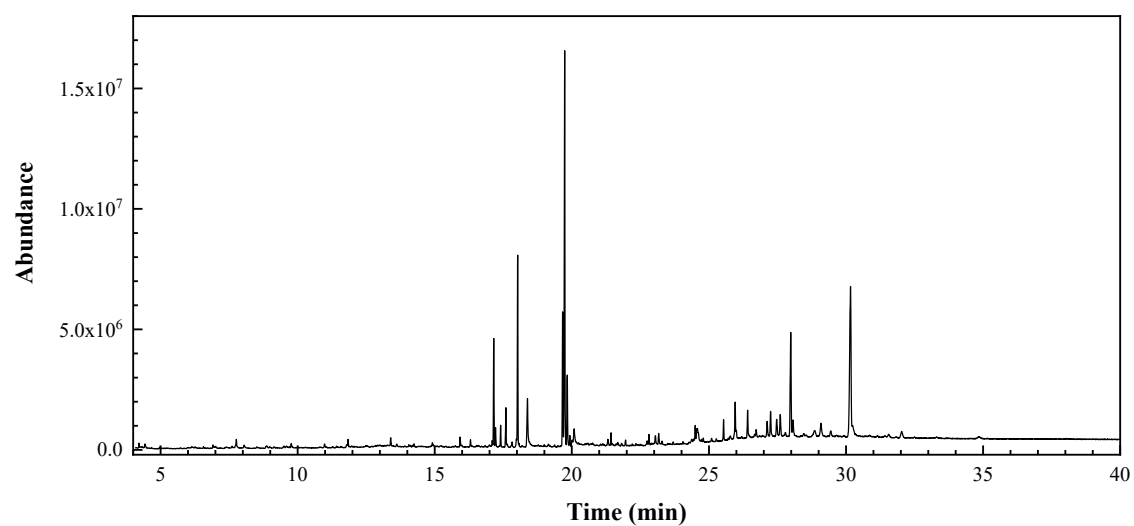

**Figure S4.** GC–MS chromatogram of *L. binervosum* leaf hydromethanolic extract.

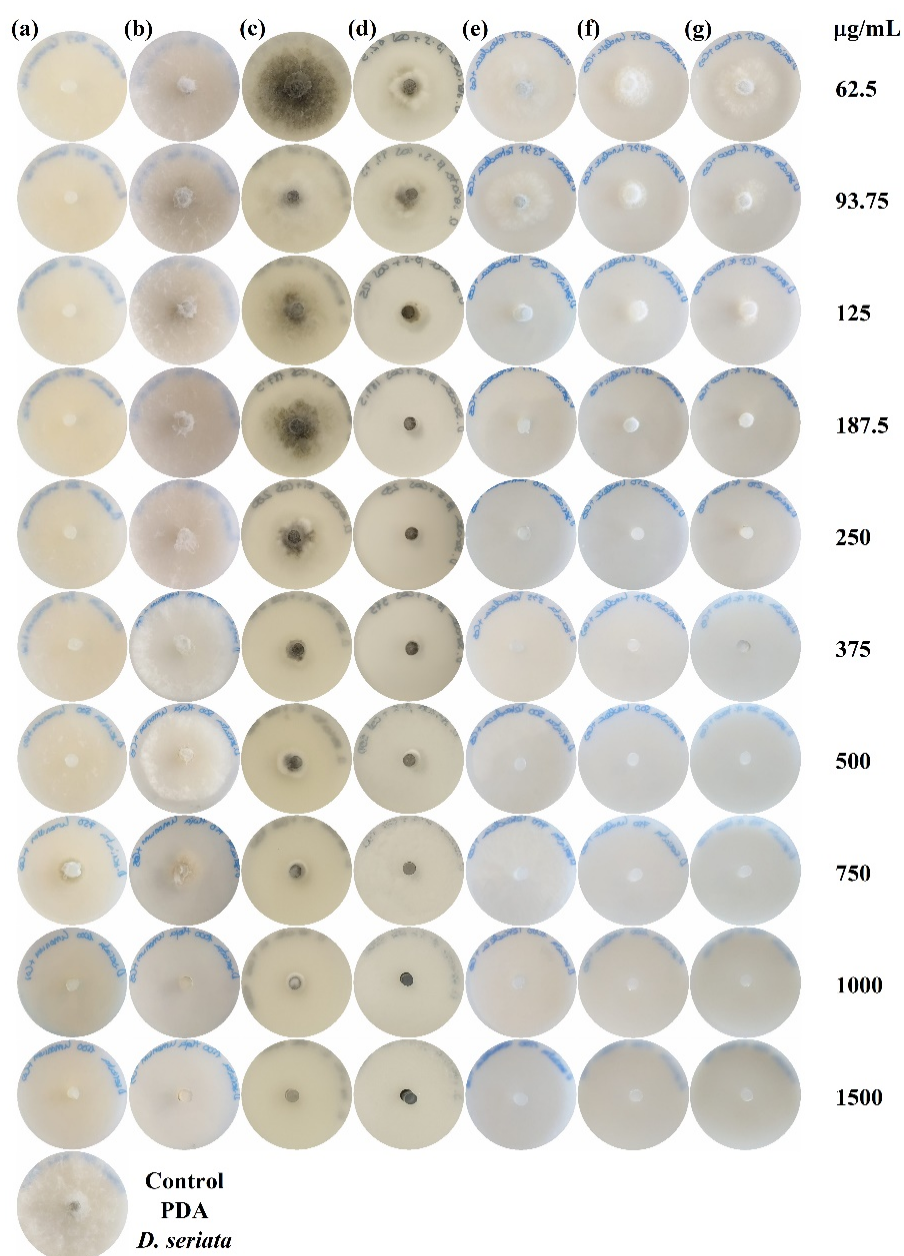

**Figure S5.** Growth inhibition of *D. seriata* for the conjugate complexes under study: (a) COS–flower extract; (b) COS–leaf extract; (c) COS–eicosane; (d) COS– $\beta$ -sitosterol; (e) COS–tetradecanoic acid; (f) COS–linolenic acid; (g) COS–vitamin E. Treatment doses from top to bottom: 62.5, 93.75, 125, 187.5, 250, 375, 500, 750, 1000 and 1500  $\mu\text{g}\cdot\text{mL}^{-1}$ . The control (PDA medium without amendments) is shown in the bottom left corner. Only one replicate is shown.

**Table S1.** GC–MS results for the *L. binervosum* flower hydromethanolic extract.

| PK | RT      | Area Pct | Library/ID                                                                                         | Ref    | CAS          | Qual |
|----|---------|----------|----------------------------------------------------------------------------------------------------|--------|--------------|------|
| 1  | 11.4140 | 0.42     | Benzeneethanol, 4-hydroxy-                                                                         | 17329  | 000501-94-0  | 72   |
| 2  | 11.8425 | 0.92     | Geranyl acetate                                                                                    | 57977  | 000105-87-3  | 90   |
| 3  | 17.1542 | 1.03     | Bicyclo[3.1.1]heptane, 2,6,6-trimethyl-, [1R-(1.alpha.,2.beta.,5.alpha.)]-                         | 17016  | 004795-86-2  | 90   |
| 4  | 17.2223 | 0.81     | 2-Pentadecanone, 6,10,14-trimethyl-                                                                | 117627 | 000502-69-2  | 96   |
| 5  | 18.0208 | 0.86     | Hexadecanoic acid, methyl ester                                                                    | 119400 | 000112-39-0  | 99   |
| 6  | 18.4054 | 4.94     | Tetradecanoic acid                                                                                 | 84452  | 000544-63-8  | 93   |
| 7  | 19.6664 | 1.07     | Heneicosane                                                                                        | 141426 | 000629-94-7  | 98   |
| 8  | 19.8319 | 0.57     | Phytol                                                                                             | 141393 | 000150-86-7  | 95   |
| 9  | 20.0169 | 0.67     | 9,12-Octadecadienoic acid (Z,Z)-                                                                   | 127649 | 000060-33-3  | 99   |
| 10 | 20.0802 | 0.67     | 9,12,15-Octadecatrienoic acid, (Z,Z,Z)-                                                            | 126110 | 000463-40-1  | 97   |
| 11 | 21.4580 | 17.61    | Eicosane                                                                                           | 129491 | 000112-95-8  | 97   |
| 12 | 22.2565 | 0.48     | Tetracosane                                                                                        | 175559 | 000646-31-1  | 99   |
| 13 | 23.0598 | 3.36     | Heneicosane                                                                                        | 141424 | 000629-94-7  | 96   |
| 14 | 23.1718 | 0.51     | Glycerol 1-palmitate                                                                               | 169227 | 000542-44-9  | 91   |
| 15 | 24.2867 | 0.39     | Tetracosane                                                                                        | 175556 | 000646-31-1  | 95   |
| 16 | 24.5009 | 0.60     | Quinoline-4-carboxamide, 2-phenyl-N-(3,4-difluorophenyl)-                                          | 190680 | 303133-50-8  | 49   |
| 17 | 24.6080 | 16.87    | Tetradecanoic acid, 2-hydroxy-, methyl ester                                                       | 109146 | 056009-40-6  | 93   |
| 18 | 25.0949 | 1.66     | Tetracosane                                                                                        | 175557 | 000646-31-1  | 93   |
| 19 | 25.3091 | 1.26     | 1,2-Tetradecanediol                                                                                | 86137  | 021129-09-9  | 64   |
| 20 | 25.5379 | 2.35     | Squalene                                                                                           | 215927 | 000111-02-4  | 98   |
| 21 | 25.5915 | 1.21     | Pentacosane, 13-undecyl-                                                                           | 235975 | 055517-89-0  | 52   |
| 22 | 25.7083 | 0.90     | Octacosane                                                                                         | 209565 | 000630-02-4  | 99   |
| 23 | 26.0248 | 14.37    | 1,2-Tetradecanediol                                                                                | 86137  | 021129-09-9  | 90   |
| 24 | 26.2780 | 0.54     | Tetracosyl trifluoroacetate                                                                        | 227109 | 1000351-76-4 | 46   |
| 25 | 26.4192 | 0.50     | 2H-1-Benzopyran-6-ol, 3,4-dihydro-2,8-dimethyl-2-(4,8,12-trimethyltridecyl)-, [2R-[2R*(4R*,8R*)]]- | 213180 | 000119-13-1  | 99   |
| 26 | 26.4873 | 0.82     | Eicosane, 9-octyl-                                                                                 | 209567 | 013475-77-9  | 53   |
| 27 | 26.7308 | 0.51     | 1-Nonadecene                                                                                       | 115906 | 018435-45-5  | 83   |
| 28 | 27.2517 | 1.13     | .gamma.-Tocopherol                                                                                 | 218064 | 007616-22-0  | 98   |
| 29 | 27.5536 | 1.23     | Fumaric acid, 3,5-difluorophenyl dodecyl ester                                                     | 210152 | 1000339-37-8 | 68   |
| 30 | 27.6071 | 3.19     | Octacosyl trifluoroacetate                                                                         | 235928 | 1000351-74-9 | 38   |
| 31 | 27.9918 | 5.56     | Vitamin E                                                                                          | 222346 | 000059-02-9  | 99   |
| 32 | 28.0745 | 0.84     | Cyclohexane, (2,2-dimethylcyclopentyl)-                                                            | 45742  | 061142-23-2  | 68   |
| 33 | 29.1115 | 1.74     | Campesterol                                                                                        | 212387 | 000474-62-4  | 62   |
| 34 | 30.1729 | 8.83     | .gamma.-Sitosterol                                                                                 | 217434 | 000083-47-6  | 99   |
| 35 | 31.1661 | 1.59     | 9,19-Cyclolanost-24-en-3-ol, (3.beta.)-                                                            | 221205 | 000469-38-5  | 90   |

**Table S2.** GC–MS results for the *L. binervosum* leaf hydromethanolic extract.

| PK | RT      | Area Pct | Library/ID                                                                                          | Ref    | CAS          | Qual |
|----|---------|----------|-----------------------------------------------------------------------------------------------------|--------|--------------|------|
| 1  | 17.1544 | 5.4114   | Bicyclo[3.1.1]heptane, 2,6,6-trimethyl-, (1.alpha.,2.beta.,5.alpha.)-                               | 17013  | 006876-13-7  | 64   |
| 2  | 17.2225 | 1.0098   | 2-Hexadecene, 3,7,11,15-tetramethyl-, [R-[R*,R*-(E)]]-                                              | 127782 | 014237-73-1  | 93   |
| 3  | 17.4027 | 1.1214   | 9-Octadecyne                                                                                        | 102606 | 035365-59-4  | 90   |
| 4  | 17.5925 | 2.1968   | Cyclohexanol, 1-ethynyl-                                                                            | 10508  | 000078-27-3  | 38   |
| 5  | 18.0258 | 9.8341   | Hexadecanoic acid, methyl ester                                                                     | 119407 | 000112-39-0  | 99   |
| 6  | 18.3861 | 4.2543   | n-Hexadecanoic acid                                                                                 | 107549 | 000057-10-3  | 99   |
| 7  | 19.6666 | 7.634    | 9,12-Octadecadienoic acid (Z,Z)-, methyl ester                                                      | 139724 | 000112-63-0  | 99   |
| 8  | 19.7396 | 22.2609  | 9,12,15-Octadecatrienoic acid, methyl ester, (Z,Z,Z)-                                               | 138095 | 000301-00-8  | 99   |
| 9  | 19.8321 | 3.8008   | Phytol                                                                                              | 141393 | 000150-86-7  | 98   |
| 10 | 20.0853 | 1.8371   | 9,12,15-Octadecatrienoic acid, (Z,Z,Z)-                                                             | 126112 | 000463-40-1  | 99   |
| 11 | 24.5011 | 0.6163   | Octocrylene                                                                                         | 191340 | 006197-30-4  | 83   |
| 12 | 25.5382 | 1.0831   | Squalene                                                                                            | 215931 | 000111-02-4  | 99   |
| 13 | 25.9617 | 2.824    | Nonacosane                                                                                          | 215180 | 000630-03-5  | 99   |
| 14 | 26.4145 | 1.7721   | 2H-1-Benzopyran-6-ol, 3,4-dihydro-2,8-dimethyl-2-(4,8,12-trimethyltridecyl)-, [2R-[2R*(4R*,8R*)]]-  | 213180 | 000119-13-1  | 98   |
| 15 | 27.1253 | 1.1363   | .beta.-Tocopherol                                                                                   | 218061 | 000148-03-8  | 99   |
| 16 | 27.2519 | 1.8386   | .gamma.-Tocopherol                                                                                  | 218064 | 007616-22-0  | 97   |
| 17 | 27.4759 | 1.2121   | Eicosane                                                                                            | 129490 | 000112-95-8  | 96   |
| 18 | 27.6073 | 1.572    | 1H-Indole-2-carboxylic acid, 6-(4-ethoxyphenyl)-3-methyl-4-oxo-4,5,6,7-tetrahydro-, isopropyl ester | 187366 | 1000316-17-5 | 40   |
| 19 | 27.9871 | 8.0828   | Vitamin E                                                                                           | 222351 | 000059-02-9  | 99   |
| 20 | 28.0698 | 1.3531   | Phytol, acetate                                                                                     | 175494 | 1000375-01-4 | 49   |
| 21 | 30.1634 | 19.1488  | .gamma.-Sitosterol                                                                                  | 217434 | 000083-47-6  | 99   |
